# Supplementary material for: Azithromycin for prevention of exacerbations in severe asthma (AZISAST): a multicentre randomised double-blind placebo-controlled trial
Source: HighWire-hosted journal article supplement (doi:10.1136/thoraxjnl-2012-202698), 2013-01-03
Supplement: thoraxjnl-2012-202698supp_appendix.pdf [file thoraxjnl-2012-202698supp_appendix.pdf]

**Supplemental Appendix:**

**Azithromycin for Prevention of Exacerbations in Severe Asthma:  
the AZISAST study**

G. Brusselle<sup>1</sup>, C. VanderStichele<sup>1</sup>, P. Jordens<sup>2</sup>, R. Deman<sup>3</sup>, H. Slabbynck<sup>4</sup>, V. Ringoet<sup>5</sup>, G. Verleden<sup>6</sup>, I. Demedts<sup>7</sup>, K. Verhamme<sup>8</sup>, A. Delporte<sup>1</sup>, B. Demeyere<sup>1</sup>, G. Claeys<sup>9</sup>, J. Boelens<sup>9</sup>, E. Padalko<sup>9</sup>, J. Verschakelen<sup>10</sup>, G. Van Maele<sup>11</sup>, E. Deschepper<sup>11</sup>, and G. Joos<sup>1</sup>.

<sup>1</sup> Department of Respiratory Medicine, Ghent University Hospital, Ghent;

<sup>2</sup> Department of Respiratory Medicine, OLV Ziekenhuis, Aalst;

<sup>3</sup> Department of Respiratory Medicine, AZ Groeninge, Kortrijk;

<sup>4</sup> Department of Respiratory Medicine, ZNA Middelheim, Antwerpen;

<sup>5</sup> Department of Respiratory Medicine, AZ Sint-Jan, Brugge;

<sup>6</sup> Department of Respiratory Medicine, University Hospital Gasthuisberg, Leuven;

<sup>7</sup> Department of Respiratory Medicine, Heilig Hart Ziekenhuis, Roeselare;

<sup>9</sup> Department of Microbiology, Clinical Chemistry and Immunology, Ghent University Hospital, Ghent;

<sup>10</sup> Department of Radiology, University Hospital Gasthuisberg, Leuven;

<sup>11</sup> Biostatistics Unit, Ghent University Hospital, Ghent;

all in Belgium, and

<sup>8</sup> Department of Epidemiology, Erasmus MC Rotterdam, the Netherlands.

Corresponding author:

Guy Brusselle

Department of Respiratory Medicine

Ghent University Hospital

De Pintelaan 185

B-9000 Ghent; Belgium

Tel: (32)(0)93322600

Fax: (32) (0)93322341

[guy.brusselle@ugent.be](mailto:guy.brusselle@ugent.be)

## **Methods**

### **Study patients**

Inclusion criteria encompassed the following criteria: 18-75 years of age; a diagnosis of persistent asthma for at least 1 year duration; a history consistent with Global Initiative for Asthma (GINA) step 4 or 5 clinical features; patients receiving high doses of inhaled corticosteroids ( $\geq 1000$   $\mu\text{g}$  fluticasone or equivalent) plus inhaled long-acting beta2-agonists for at least 6 months prior to screening; patients suffering multiple (at least two) independent, severe asthma exacerbations requiring treatment with systemic corticosteroids and/or LRTI requiring treatment with antibiotics, within the previous 12 months; never-smokers or ex-smokers with a smoking history of  $\leq 10$  pack-years; and a fractional excretion of exhaled nitric oxide (FeNO) level below the upper limit of normal according to gender, atopic status and smoking history.<sup>1</sup> Subjects with FeNO levels above the upper limit of normal were excluded, since high FeNO levels in symptomatic patients with asthma have been associated with eosinophilic airway inflammation due to persistent allergen exposure or poor adherence to inhaled corticosteroids.<sup>2</sup> All subjects were followed by respiratory physicians, checking and optimizing patient's inhalation technique prior to enrollment into the study. All eligible patients had to have a diagnosis of persistent asthma, according to the Global Initiative for Asthma (GINA) guidelines, implicating the presence of variable airflow obstruction as evidenced by (1) spirometry with acute reversibility testing (pre- and post-bronchodilator FEV<sub>1</sub>), (2) bronchial provocation testing (positive histamine or methacholine challenge test) or (3) peak flow variability. The asthma patients had to fulfill at least one of these criteria of variable airflow obstruction in their medical history.

Exclusion criteria were a prolonged corrected QT interval, severe bronchiectasis, significant medical conditions or significant laboratory abnormalities that might interfere with the study conduct or patient's safety, pregnancy or breastfeeding, prohibited concomitant medication including anti-IgE treatment and treatment with macrolide antibiotics within the last three months.

Patients continued maintenance treatment with high doses inhaled corticosteroids ( $\geq 1000$   $\mu\text{g}$  fluticasone or equivalent) and long-acting beta2-agonists during the trial. Salbutamol 100  $\mu\text{g}$  per puff was provided as rescue medication. In patients under chronic maintenance treatment with oral corticosteroids, the dose was kept stable until visit 3 (after 4 weeks of study drug treatment) and could then be tapered to the lowest possible dose, at the discretion of the investigator.

### **Study design and oversight**

The AZIthromycin in Severe ASThma (AZISAST) study was a randomized, double-blind, placebo-controlled, parallel-group, multicenter study (see supplementary appendix Figure S1). After a 2 week run-in period, patients were randomly assigned, in a 1:1 ratio, to receive add-on therapy with either azithromycin or placebo using a central web-based randomisation tool, available at a secured study website to the central study staff. Patients who developed a severe asthma exacerbation or lower respiratory tract infection during the run-in period were to be randomized 6 weeks after recovery from the infection or exacerbation.

The hospital pharmacist at the site of the principal investigator formulated the study drugs: capsules with either 250 mg of azithromycin (prepared from capsules of Zitromax®) or placebo, indistinguishable without chemical analysis. After randomisation, the patients took one capsule per day during 5 days and then one capsule three times a week. Total treatment period was 26 weeks (until Visit 6), with a study-drug-free follow-up period of 4 weeks (Visit 7).

The AZISAST study was an academic clinical trial, without sponsorship from the pharmaceutical industry. The study has been funded by the Agency for Innovation by Science and Technology (IWT 70709), Flanders, Belgium. The principal investigator was the main author of the manuscript; all the authors reviewed the drafts and approved the final text for publication. All authors vouch for the accuracy of the reported data and the fidelity to the study protocol.

The study protocol was approved by the central ethics committee at the site of the principal investigator (Ghent University Hospital, Ghent, Belgium), and was reviewed by the local ethics committees at each participating site. All patients provided written informed consent.

### **Assessments**

At screening, demographic information was recorded, as well as medical history, concomitant medication and an extensive asthma history, including information about atopy and comorbidities. An electrocardiography (ECG), a chest X-ray, a high resolution CT-scan of the chest and blood samples were taken to check exclusion criteria before randomisation.

At each visit, vital signs were measured and a physical examination was performed. Lab tests were repeated at visit 3, 4 and 6 (at week 4, 10 and 26 of the treatment period, respectively; Supplemental Figure S1). Adverse events were assessed at each visit.

### **Lung function**

Assessments included pulmonary function tests, encompassing pre- and postbronchodilator spirometry (performed at each visit), and lung volumes and diffusing capacity of the lung (DLCO) (performed at the start and end of the treatment period). Spirometry was performed according to ATS / ERS task force on Standardisation of Lung Function Testing.<sup>3</sup> Before each spirometry, a FeNO measurement was performed with a Niox or Niox Mino analyser according to the ATS/ERS recommendations.<sup>4</sup>

### **Patient Diary**

Patients kept a diary and recorded the following items during the 2 weeks preceding each study visit: Peak Expiratory Flow (PEF) in the morning and evening (highest of 3 values recorded), number of occasions of inhalation of rescue medication, day and night symptoms. Subjects also reported information about medical consumption related to asthma in their diary.

### **Questionnaires**

The Asthma Control Questionnaire (ACQ) and the Asthma Quality of Life Questionnaire (AQLQ) had to be completed by the patient at visit 2, 4 and 6 (at randomisation, at week 10 and 26 of the treatment period; see Supplemental Figure S1). The EuroQol 5D questionnaire (EQ-5D), a standardised instrument as a measure of health outcome, was completed at visit 2 and visit 6.

### **Serology**

Serology for *Chlamydomphila pneumoniae* and *Mycoplasma pneumoniae* were determined at enrollment and at the end of the treatment phase. Separate blood samples taken at screening (visit 1) and at the end of the treatment period (visit 6) were sent to the central laboratory at Ghent University Hospital to determine IgG and IgM antibodies against *Chlamydomphila pneumoniae* and *Mycoplasma pneumoniae* by SeroCP<sup>TM</sup> Recombinant IgG, SeroCP<sup>TM</sup> Recombinant IgM, SeroMP<sup>TM</sup> Recombinant IgG and SeroMP<sup>TM</sup> Recombinant IgM respectively, all from Savyon Diagnostics (St. Ashdod, Israel). All serological tests were

performed according to the manufacturer's instructions on the BEPIII Behring ELISA processor (Siemens, Munich, Germany).

### **Bacteriological substudy**

In two centers (Ghent University Hospital and OLV Hospital Aalst), we performed a bacteriological sub-study to determine macrolide resistance in streptococci with oropharyngeal swabs<sup>5</sup>, taken at four different visits: visit 2, 3, 6 and 7 (before randomisation, after 4 and 26 weeks of study drug treatment and at the final visit, after a washout period of 4 weeks, respectively; see Supplemental Figure S1).

### **Statistical analysis**

#### **Primary efficacy outcome analysis**

Mean primary endpoint rates and mean exacerbation rates per treatment group were investigated using Poisson or negative binomial regression as appropriate.<sup>6</sup> When subjects withdrew from the study, their number of primary endpoints (exacerbations and LRTI requiring treatment with antibiotics) was adjusted as follows: recorded number of observations + (days remaining/total study period in days) x mean primary endpoint frequency in the study group. As a supporting analysis, and to alternatively account for varying lengths of treatment for patients who dropped out from the trial prematurely, primary endpoint rates and exacerbation rates were calculated for each patient separately and compared between treatment groups using the Wilcoxon rank-sum test.

#### **Sample size calculation**

To have a power of 0.80 (the maximum likelihood of making a type II [false-negative] error being  $\beta = 20\%$ ) and to have a level of statistical significance of 0.05 (two-sided testing with  $\alpha = 0.05$ ), and taking into account an estimated standardized effect size of 0.22 on the primary outcome (the rate of primary endpoints), a sample size of 54 evaluable patients per treatment arm was required. For both groups together, 108 evaluable patients were thus required. Estimating the drop out rate at  $\pm 10\%$ , approximately 120 patients with severe asthma needed to be randomized in the AZISAST study.

## Results

### **Predefined subgroup analysis of response to macrolide treatment according to severe asthma phenotype**

Since severe asthma is biologically heterogenous, and since macrolides have anti-inflammatory effects in noneosinophilic (neutrophilic) chronic airway diseases, we performed a predefined subgroup analysis comparing the efficacy of azithromycin versus placebo depending on the presence or absence of blood eosinophilia at baseline. In subjects with severe asthma and blood eosinophilia  $\leq 200/\mu\text{L}$  (i.e. noneosinophilic severe asthma), azithromycin significantly reduced the rate of primary endpoints compared to placebo (Figure 2C). Based on a Poisson regression model, the estimated primary endpoint rate for non-eosinophilic severe asthma was 0.44 (95% CI 0.25 to 0.78) in the azithromycin group and 1.03 (95% CI 0.72 to 1.48) in the placebo group ( $P=0.013$ ). In contrast, the primary endpoint rate for eosinophilic severe asthma was 0.96 (95% CI 0.66 to 1.41) in the azithromycin group compared to 0.50 (95% CI 0.28 to 0.88) in the placebo group ( $P=0.058$ ). Importantly, in the Poisson regression model, there is a statistical significant interaction between the (non)eosinophilic phenotype of severe asthma and the treatment arm ( $P=0.002$ ).

In subjects with noneosinophilic asthma, azithromycin also significantly decreased the number of patients with at least one primary endpoint (9 out of 27 [33%] of azithromycin-treated subjects, compared with 18 out of 29 [62%] of placebo-treated subjects; relative risk: 0.54, 95% CI, 0.29 to 0.98,  $P=0.037$ ). In contrast, there was a trend towards a higher percentage of subjects experiencing at least one primary endpoint in patients with severe asthma and blood eosinophilia  $> 200/\mu\text{L}$  (relative risk: 1.67, 95% CI, 0.98 to 2.83,  $P=0.058$ ).

### **Predefined subgroup analysis of response to macrolide treatment according to *Chlamydomphila pneumoniae* serology**

Since *Chlamydomphila pneumoniae* has been associated with severe asthma and accelerated progression of disease, and since macrolides have antibiotic effects towards atypical bacteria, we performed a predefined subgroup analysis comparing the efficacy of azithromycin versus placebo depending on the presence or absence of *C. pneumoniae* immunoglobulin G (IgG) in serum at baseline. A positive *C. pneumoniae* serology, demonstrated in 64% of the ITT population, did not affect the therapeutic response to azithromycin or placebo, as compared with subjects with a negative *C. pneumoniae* serology at baseline (see Supplemental Figure S2). During the 26-weeks treatment phase of the study, one acute *C. pneumoniae* infection and two acute *M. pneumoniae* infections were

demonstrated by IgG seroconversion (as recommended by the IDSA/ATS consensus guidelines).<sup>7</sup>

### **Tapering of oral corticosteroids during the 26-week treatment phase**

At randomization, twelve subjects (nine in the azithromycin group and three in the placebo group) were corticoid-dependent, receiving chronic maintenance treatment with oral corticosteroids at a median dose of 10 mg prednisolone per day. In these patients, the dose was kept stable until visit 3 (after 4 weeks of study drug treatment) and could then be tapered to the lowest possible dose, at the discretion of the investigator. At the end of the treatment phase, the median dose of prednisolone had been reduced to 5 mg per day in the azithromycin arm, whereas the median dose remained 10 mg per day in the placebo arm. In two subjects of the azithromycin group, oral corticosteroid treatment could be stopped.

## Safety

**Supplemental Appendix Table S1: Adverse events**

|                                             | Placebo (n=54) | Azithromycin (n=55) |       |
|---------------------------------------------|----------------|---------------------|-------|
| <b>Adverse events *</b>                     |                |                     |       |
| - Subjects (%)                              | 39 (72%)       | 37 (67%)            | 0.678 |
| - asthma exacerbation                       | 41             | 40                  |       |
| - LRT infection                             | 34             | 24                  |       |
| - diarrhoea                                 | 8              | 3                   |       |
| - nausea                                    | 2              | 1                   |       |
| - abdominal pain                            | 8              | 2                   |       |
| - vertigo                                   | 1              | 2                   |       |
| - headache                                  | 3              | 4                   |       |
| - allergic reactions                        | 1              | 2                   |       |
| - elevated liver function tests             | 0              | 2                   |       |
| - thrombocytopenia                          | 0              | 1                   |       |
| - leucopenia                                | 0              | 1                   |       |
| - other                                     | 7              | 6                   |       |
| - Total adverse events                      | 105            | 88                  |       |
| <b>Serious adverse events</b>               |                |                     |       |
| - Subjects (%)                              | 6(11%)         | 6 (11%)             | 1.000 |
| - # SAE :                                   |                |                     |       |
| 0                                           | 48 (89%)       | 49 (89%)            |       |
| 1                                           | 6 (11%)        | 5 (9%)              |       |
| 2                                           | 0 (0%)         | 1 (2%)              |       |
| <b>Drug related adverse events</b>          |                |                     |       |
| - Subjects (%)                              | 3 (6%)         | 4 (7%)              | 1.000 |
| - # Drug related adverse event :            |                |                     |       |
| 0                                           | 51 (94%)       | 51 (93%)            |       |
| 1                                           | 2 (4%)         | 2 (4%)              |       |
| 2                                           | 1 (2%)         | 2 (4%)              |       |
| <b>Discontinuation</b>                      | 5 (9%)         | 2 (4%)              | 0.271 |
| <b>Discontinuation due to adverse event</b> | 2 (4%)         | 1 (2%)              | 0.618 |

Abbreviations: LRT: lower respiratory tract; SAE: serious adverse event.

\* all adverse events till end of study.



## Discussion

### **Similarities between severe asthma and bronchiolitis obliterans syndrome concerning response to treatment with macrolides (azithromycin)**

The differential effect of azithromycin in severe asthma according to the asthma phenotype (noneosinophilic versus eosinophilic asthma) is reminiscent of the effect of azithromycin in chronic rejection or bronchiolitis obliterans syndrome (BOS) after lung transplantation.<sup>8</sup> In observational studies, we have revealed a dichotomy in the pathogenesis and clinical phenotype of BOS, encompassing a neutrophilic reversible allograft dysfunction, responding to azithromycin, and a fibroproliferative BOS, not responding to azithromycin.<sup>8</sup> Azithromycin significantly reduced airway interleukin-8 and neutrophilia in patients with BOS.<sup>9</sup> Importantly, in a double-blind randomized placebo-controlled trial, we have shown that chronic treatment with low-dose azithromycin reduced the prevalence of BOS after lung transplantation.<sup>10</sup>

### **Mechanisms of action of macrolides in non-eosinophilic severe asthma**

The beneficial effects of azithromycin in noneosinophilic severe asthma might be due to antibiotic properties or anti-inflammatory and immunomodulatory effects. Several observations favour the antimicrobial activities of macrolides as mechanism of action: recurrent respiratory infections are associated with frequent exacerbations in adults with difficult-to-treat asthma<sup>11</sup>; severe asthma has been shown to be an independent risk factor for invasive pneumococcal disease<sup>12</sup>; and the microbiome of the lower airways and lungs is altered in patients with asthma compared to healthy controls.<sup>13</sup> Chronic respiratory infection with atypical bacteria such as *Mycoplasma pneumoniae* or *Chlamydia pneumoniae* might play a role in the pathogenesis of severe asthma.<sup>14</sup> A trial of roxithromycin in subjects with asthma and serological evidence of infection with *C. pneumoniae* did not lead to sustained improvements of asthma control<sup>15</sup>, which is in line with our observations that positive IgG antibodies to *C. pneumoniae* did not predict therapeutic efficacy of azithromycin in severe asthma. Although application of polymerase chain reaction (PCR) on bronchoalveolar lavage fluid or endobronchial biopsies is considered the gold standard to differentiate between subjects with true chronic *C. pneumoniae* infection and those previously exposed but not

currently infected<sup>16</sup>, only 12 out of 92 patients in the Asthma Clinical Research Network trial with clarithromycin had PCR evidence of infection.<sup>17</sup>

## References

1. Travers J, Marsh S, Aldington S, Williams M, Shirtcliffe P, Pritchard A, et al. Reference Ranges for Exhaled Nitric Oxide Derived from a Random Community Survey of Adults. *American Journal of Respiratory and Critical Care Medicine*. 2007 August 1, 2007;176(3):238-42.
2. Dweik RA, Boggs PB, Erzurum SC, Irvin CG, Leigh MW, Lundberg JO, et al. An Official ATS Clinical Practice Guideline: Interpretation of Exhaled Nitric Oxide Levels (FENO) for Clinical Applications 10.1164/rccm.9120-11ST. *Am J Respir Crit Care Med*. 2011 September 1, 2011;184(5):602-15.
3. Miller MR, Hankinson J, Brusasco V, Burgos F, Casaburi R, Coates A, et al. Standardisation of spirometry. *Eur Respir J*. 2005 Aug;26(2):319-38.
4. ATS/ERS Recommendations for Standardized Procedures for the Online and Offline Measurement of Exhaled Lower Respiratory Nitric Oxide and Nasal Nitric Oxide, 2005. *Am J Respir Crit Care Med*. 2005 April 15, 2005;171(8):912-30.
5. Malhotra-Kumar S, Lammens C, Coenen S, Van Herck K, Goossens H. Effect of azithromycin and clarithromycin therapy on pharyngeal carriage of macrolide-resistant streptococci in healthy volunteers: a randomised, double-blind, placebo-controlled study. *The Lancet*. 2007;369(9560):482-90.
6. Keene ON, Calverley PM, Jones PW, Vestbo J, Anderson JA. Statistical analysis of COPD exacerbations. *Eur Respir J*. 2008 Nov;32(5):1421-2.
7. Mandell LA, Wunderink RG, Anzueto A, Bartlett JG, Campbell GD, Dean NC, et al. Infectious Diseases Society of America/American Thoracic Society consensus guidelines on the management of community-acquired pneumonia in adults. *Clin Infect Dis*. 2007 Mar 1;44 Suppl 2:S27-72.
8. Vanaudenaerde BM, Meyts I, Vos R, Geudens N, De Wever W, Verbeken EK, et al. A dichotomy in bronchiolitis obliterans syndrome after lung transplantation revealed by azithromycin therapy. *Eur Resp J*. 2008 October 1, 2008;32(4):832-42.
9. Verleden GM, Vanaudenaerde BM, Dupont LJ, Van Raemdonck DE. Azithromycin Reduces Airway Neutrophilia and Interleukin-8 in Patients with Bronchiolitis Obliterans Syndrome. *American Journal of Respiratory and Critical Care Medicine*. 2006 September 1, 2006;174(5):566-70.
10. Vos R, Vanaudenaerde BM, Verleden SE, De Vleeschauwer SI, Willems-Widyastuti A, Van Raemdonck DE, et al. A randomised controlled trial of azithromycin to prevent chronic rejection after lung transplantation. *Eur Resp J*. 2011 January 1, 2011;37(1):164-72.
11. ten Brinke A, Sterk PJ, Masclee AAM, Spinhoven P, Schmidt JT, Zwinderman AH, et al. Risk factors of frequent exacerbations in difficult-to-treat asthma. *Eur Resp J*. 2005 November 1, 2005;26(5):812-8.
12. Talbot TR, Hartert TV, Mitchel E, Halasa NB, Arbogast PG, Poehling KA, et al. Asthma as a Risk Factor for Invasive Pneumococcal Disease. *N Engl J Med*. 2005 May 19, 2005;352(20):2082-90.
13. Hilty M, Burke C, Pedro H, Cardenas P, Bush A, Bossley C, et al. Disordered microbial communities in asthmatic airways. *PLoS One*. 2010;5(1):e8578.
14. Martin RJ, Kraft M, Chu HW, Berns EA, Cassell GH. A link between chronic asthma and chronic infection. *Journal of Allergy and Clinical Immunology*. 2001;107(4):595-601.
15. BLACK PN, BLASI F, JENKINS CR, SCICCHITANO R, MILLS GD, RUBINFELD AR, et al. Trial of Roxithromycin in Subjects with Asthma and Serological Evidence of

Infection with *Chlamydia pneumoniae*. *American Journal of Respiratory and Critical Care Medicine*. 2001 August 15, 2001;164(4):536-41.

16. Kraft M, Cassell GH, Pak J, Martin RJ. *Mycoplasma pneumoniae* and *Chlamydia pneumoniae* in asthma: effect of clarithromycin. *Chest*. 2002 Jun;121(6):1782-8.

17. Sutherland ER, King TS, Icitovic N, Ameredes BT, Bleecker E, Boushey HA, et al. A trial of clarithromycin for the treatment of suboptimally controlled asthma. *Journal of Allergy and Clinical Immunology*. 2010;126(4):747-53.
