# Supplementary material for: Azithromycin for prevention of exacerbations in severe asthma (AZISAST): a multicentre randomised double-blind placebo-controlled trial
Source: HighWire-hosted journal article supplement (doi:10.1136/thoraxjnl-2012-202698), 2013-01-03

**Supplemental Figure S2. Primary Endpoints According to Serology for *Chlamydomphila pneumoniae*.**

Panel A shows the proportion of participants free from primary endpoints for 26 weeks, according to study group, in subjects with negative immunoglobulin G (IgG) to *C. pneumoniae* at baseline. Panel B shows the proportion of participants free from primary endpoints for 26 weeks, according to study group, in subjects with positive IgG to *C. pneumoniae* at baseline. A primary endpoint was defined as a severe asthma exacerbation requiring treatment with systemic corticosteroids, emergency room visit or hospitalisation<sup>17</sup>, and/or an acute lower respiratory tract infection requiring treatment with antibiotics.

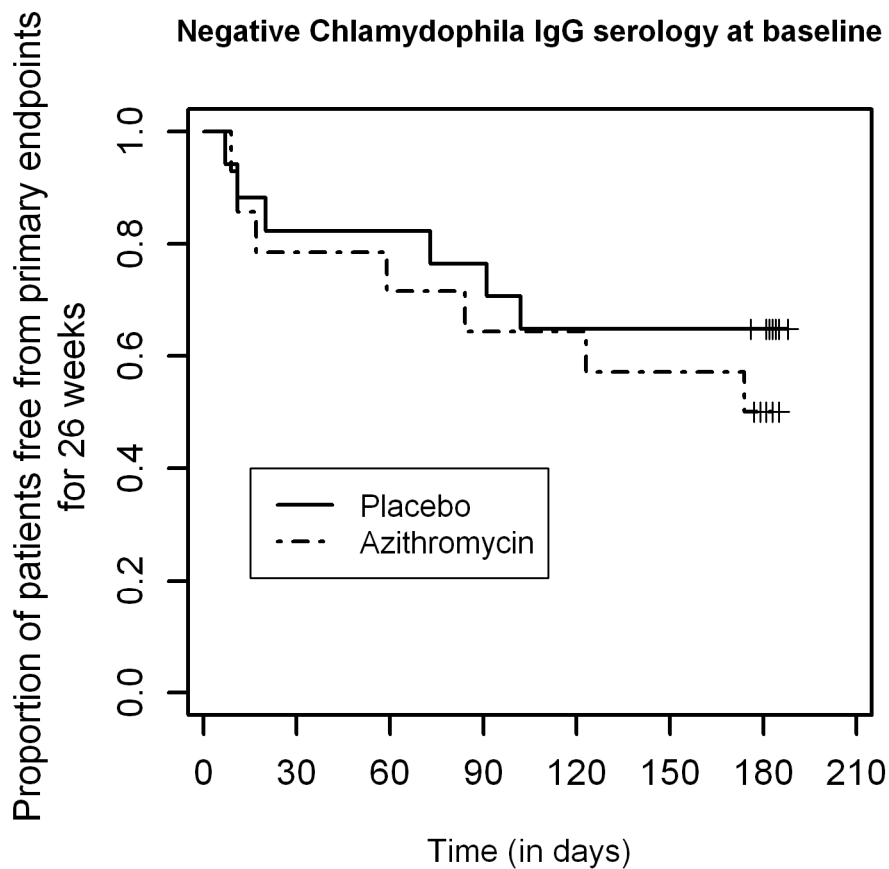

Proportion of patients free from primary endpoints  
for 26 weeks

**Positive Chlamydomphila IgG serology at baseline**

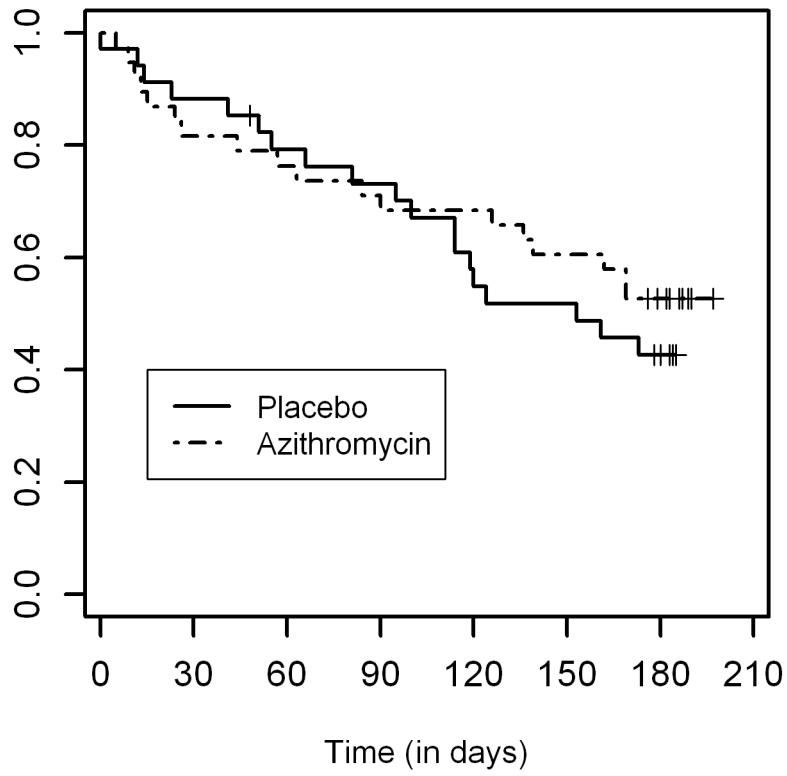

Supplement: thoraxjnl-2012-202698supp_figure2.pdf [file thoraxjnl-2012-202698supp_figure2.pdf]
